# Supplementary material for: Posttranscriptional repression of the cel gene of the ColE7 operon by the RNA-binding protein CsrA of Escherichia coli
Source: PubMed Central journal article supplement — Nucleic Acids Res. 2010 Apr 8;38(12):3936–51. doi: 10.1093/nar/gkq177 (PMC2896534; doi:10.1093/nar/gkq177), 2010-04-08
Supplement: gkq177_1.pdf [file gkq177_1.pdf]

## Supplementary Figure S1.

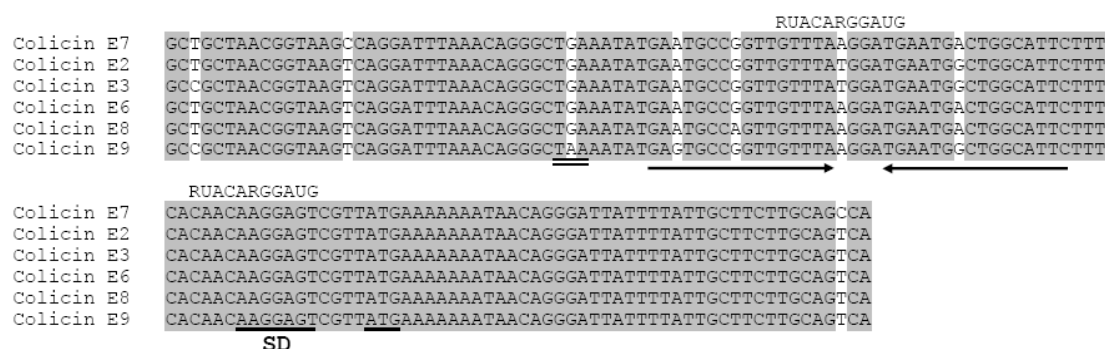

### Figure Legends

**Figure S1.** Sequence alignment of the *cei-cel* intercistronic region and the *cel* leader region from several E group Col plasmids. Identical nucleotides are indicated by gray shading. The overall sequence identity is 99%. Accession numbers are provided in the text. The *cei* stop codon is double underlined. The two horizontal inverted arrows indicate the T1 transcriptional terminator. The Shine-Dalgarno (SD) sequence and the ATG start codon for the *cel* coding region are underlined. The CsrA binding consensus sequence is shown above the potential binding region in *cel* mRNA (R = A or G). The T1 hairpin sequence and the *cel* SD sequence between these E group Col plasmids displayed high similarity to the consensus sequence, as they match the SELEX-derived consensus binding sequence in 8 and 7 out of 11 positions, respectively.
